# Supplementary material
Source: PubMed Central journal article supplement (PMC4138243)
Supplement: NIHMS592016-supplement-01.pdf [file NIHMS592016-supplement-01.pdf]

**Supplemental Figure.** Incidence of PDM/DM at follow-up by insulin resistance index levels at baseline.

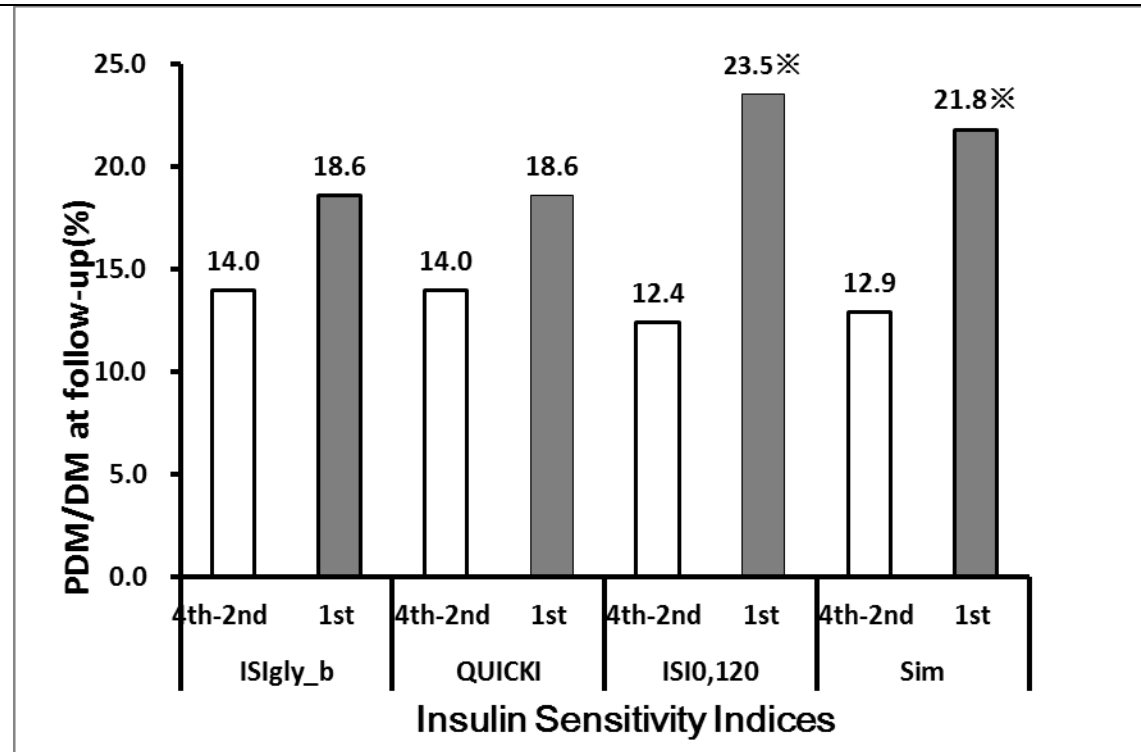

\*P < 0.01 compared with 4<sup>th</sup>-2<sup>nd</sup> quartile group.
